# Supplementary material for: Spinal cord extracts of amyotrophic lateral sclerosis spread TDP-43 pathology in cerebral organoids
Source: PubMed Central journal article supplement (PMC9934440; doi:10.1371/journal.pgen.1010606), 2023-02-06
Supplement: pgen.1010606.s002.pdf [file pgen.1010606.s002.pdf]

**S2 Table**

| Case number | Diagnosis           | <i>C9orf72</i> gene | Region   | Gender | Age at onset | Age at death | Post-mortem delay (hours) | Source    |
|-------------|---------------------|---------------------|----------|--------|--------------|--------------|---------------------------|-----------|
| Control 1   | Cerebral hemorrhage | N.A.                | Cervical | Female | 65           | 65           | unknown                   | MNI/DBCBB |
| Control 2   | -                   | -                   | Cervical | Female | -            | 72           | 41                        | LNDBB     |
| Control 3   | -                   | -                   | Cervical | Male   | -            | 63           | 23                        | LNDBB     |
| Patient 1   | Sporadic ALS        | Normal              | Cervical | Male   | 46           | 50           | 12                        | MNI/DBCBB |
| Patient 2   | Sporadic ALS        | Normal              | Cervical | Female | 59           | 62           | 22                        | MNI/DBCBB |
| Patient 3   | Sporadic ALS        | Expanded            | Cervical | Male   | unknown      | 51           | 10                        | MNI/DBCBB |
| Patient 4   | Sporadic ALS        | Normal              | Cervical | Female | unknown      | 58           | 31                        | MNI/DBCBB |
| Patient 5   | Sporadic ALS        | Normal              | Cervical | Male   | 78           | 79           | 27                        | MNI/DBCBB |
