# Supplementary material for: Spinal cord extracts of amyotrophic lateral sclerosis spread TDP-43 pathology in cerebral organoids
Source: PubMed Central journal article supplement (PMC9934440; doi:10.1371/journal.pgen.1010606), 2023-02-06
Supplement: pgen.1010606.s003.pdf [file pgen.1010606.s003.pdf]

**S3 Table**

| Antibody (clone)                        | Source (catalog number)       | Host    | IF     | IHC    | WB/DB   |
|-----------------------------------------|-------------------------------|---------|--------|--------|---------|
| CTIP2 (25B6)                            | Abcam (ab18465)               | rat     | 1:500  | N.A.   | N.A.    |
| PAX6 (Poly19013)                        | Bio Legend (901301)           | rabbit  | 1:100  | N.A.   | N.A.    |
| SOX2 (9-9-3)                            | Abcam (ab79351)               | mouse   | 1:200  | N.A.   | N.A.    |
| TUJ1 (Poly18020)                        | Bio Legend (802001)           | rabbit  | 1:5000 | N.A.   | N.A.    |
| TUJ1                                    | Abcam (ab41489)               | chicken | 1:1000 | N.A.   | N.A.    |
| phospho TDP-43 (pS409/410)              | Cosmo Bio (TIP-PTD-M01)       | mouse   | 1:1000 | N.A.   | 1:2000  |
| phospho TDP-43 (pS409/410)              | Cosmo Bio (TIP-PTD-P02)       | rabbit  | 1:1000 | N.A.   | N.A.    |
| phospho TDP-43 (pS409)                  | Cosmo Bio (TIP-PTD-P03)       | rabbit  | N.A.   | 1:1000 | N.A.    |
| TDP-43                                  | Proteintech (10782-2-AP)      | rabbit  | 1:200  | N.A.   | N.A.    |
| GFAP                                    | Invitrogen (PA5-16291)        | rabbit  | 1:200  | N.A.   | 1:2000  |
| GR repeat                               | Proteintech (23978-1-AP)      | rabbit  | 1:100  | N.A.   | 1:1000  |
| cleaved caspase-3 (E83-77)              | Abcam (ab32042)               | rabbit  | 1:200  | N.A.   | 1:500   |
| $\gamma$ H2AX (pS139)                   | Novus Biologicals (NB100-384) | rabbit  | 1:1000 | N.A.   | 1:10000 |
| anti-rat Alexa Fluor 488-conjugated     | Invitrogen                    | goat    | 1:1000 | N.A.   | N.A.    |
| anti-rabbit Alexa Fluor 488-conjugated  | Invitrogen                    | goat    | 1:1000 | N.A.   | N.A.    |
| anti-rabbit Alexa Fluor 555-conjugated  | Invitrogen                    | goat    | 1:1000 | N.A.   | N.A.    |
| anti-mouse Alexa Fluor 488-conjugated   | Invitrogen                    | goat    | 1:1000 | N.A.   | N.A.    |
| anti-mouse Alexa Fluor 555-conjugated   | Invitrogen                    | goat    | 1:1000 | N.A.   | N.A.    |
| anti-chicken Alexa Fluor 488-conjugated | Invitrogen                    | goat    | 1:1000 | N.A.   | N.A.    |
| anti-rabbit peroxidase-conjugated       | Invitrogen                    | donkey  | N.A.   | N.A.   | 1:10000 |
| anti-mouse peroxidase-conjugated        | Invitrogen                    | donkey  | N.A.   | N.A.   | 1:10000 |
